# Supplementary material for: Meta-analysis of efficacy and adverse events of erlotinib-based targeted therapies for advanced/metastatic non-small cell lung cancer
Source: PubMed Central journal article supplement (PMC5689727; doi:10.18632/oncotarget.19735), 2017-07-31
Supplement: oncotarget-08-86816-s001.pdf [file oncotarget-08-86816-s001.pdf]

# Meta-analysis of efficacy and adverse events of erlotinib-based targeted therapies for advanced/metastatic non-small cell lung cancer

## SUPPLEMENTARY MATERIALS

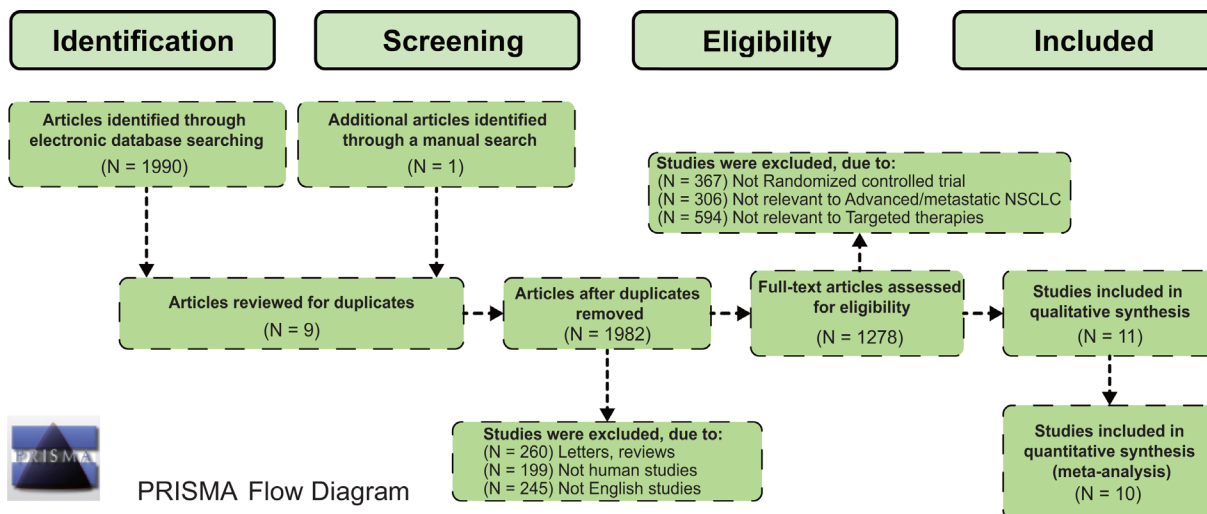

Supplementary Figure 1: Flow diagram of the literature search.

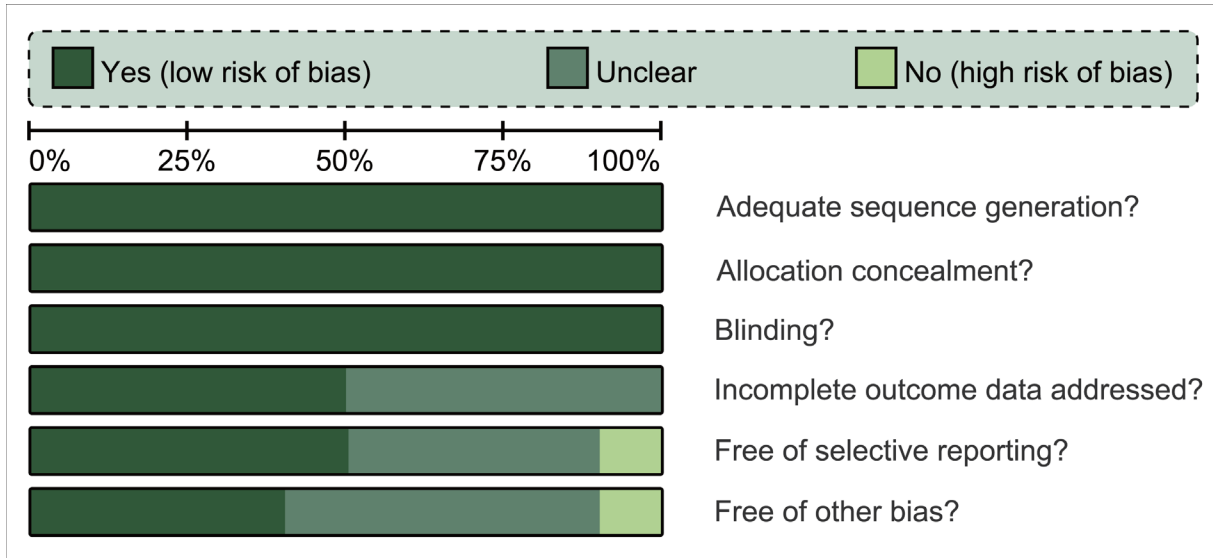

Supplementary Figure 2: Cochrane risk of bias graph of included studies.

Supplementary Table 1: The baseline characteristics for included studies. See Supplementary\_Table\_1
